# Supplementary material for: Parents’ perspectives on preparing for parenthood: a qualitative study on Greenland’s universal parenting programme MANU 0–1 year
Source: Springer Nature journal article supplement (doi:10.1186/s12884-022-05170-4), 2022-11-20

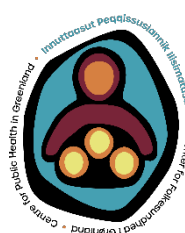

**SDU** 

NATIONAL INSTITUTE OF  
PUBLIC HEALTH

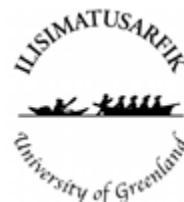

Christine Ingemann (chin@sdu.dk)

## Appendix 2. Circle diagram for interview guide.

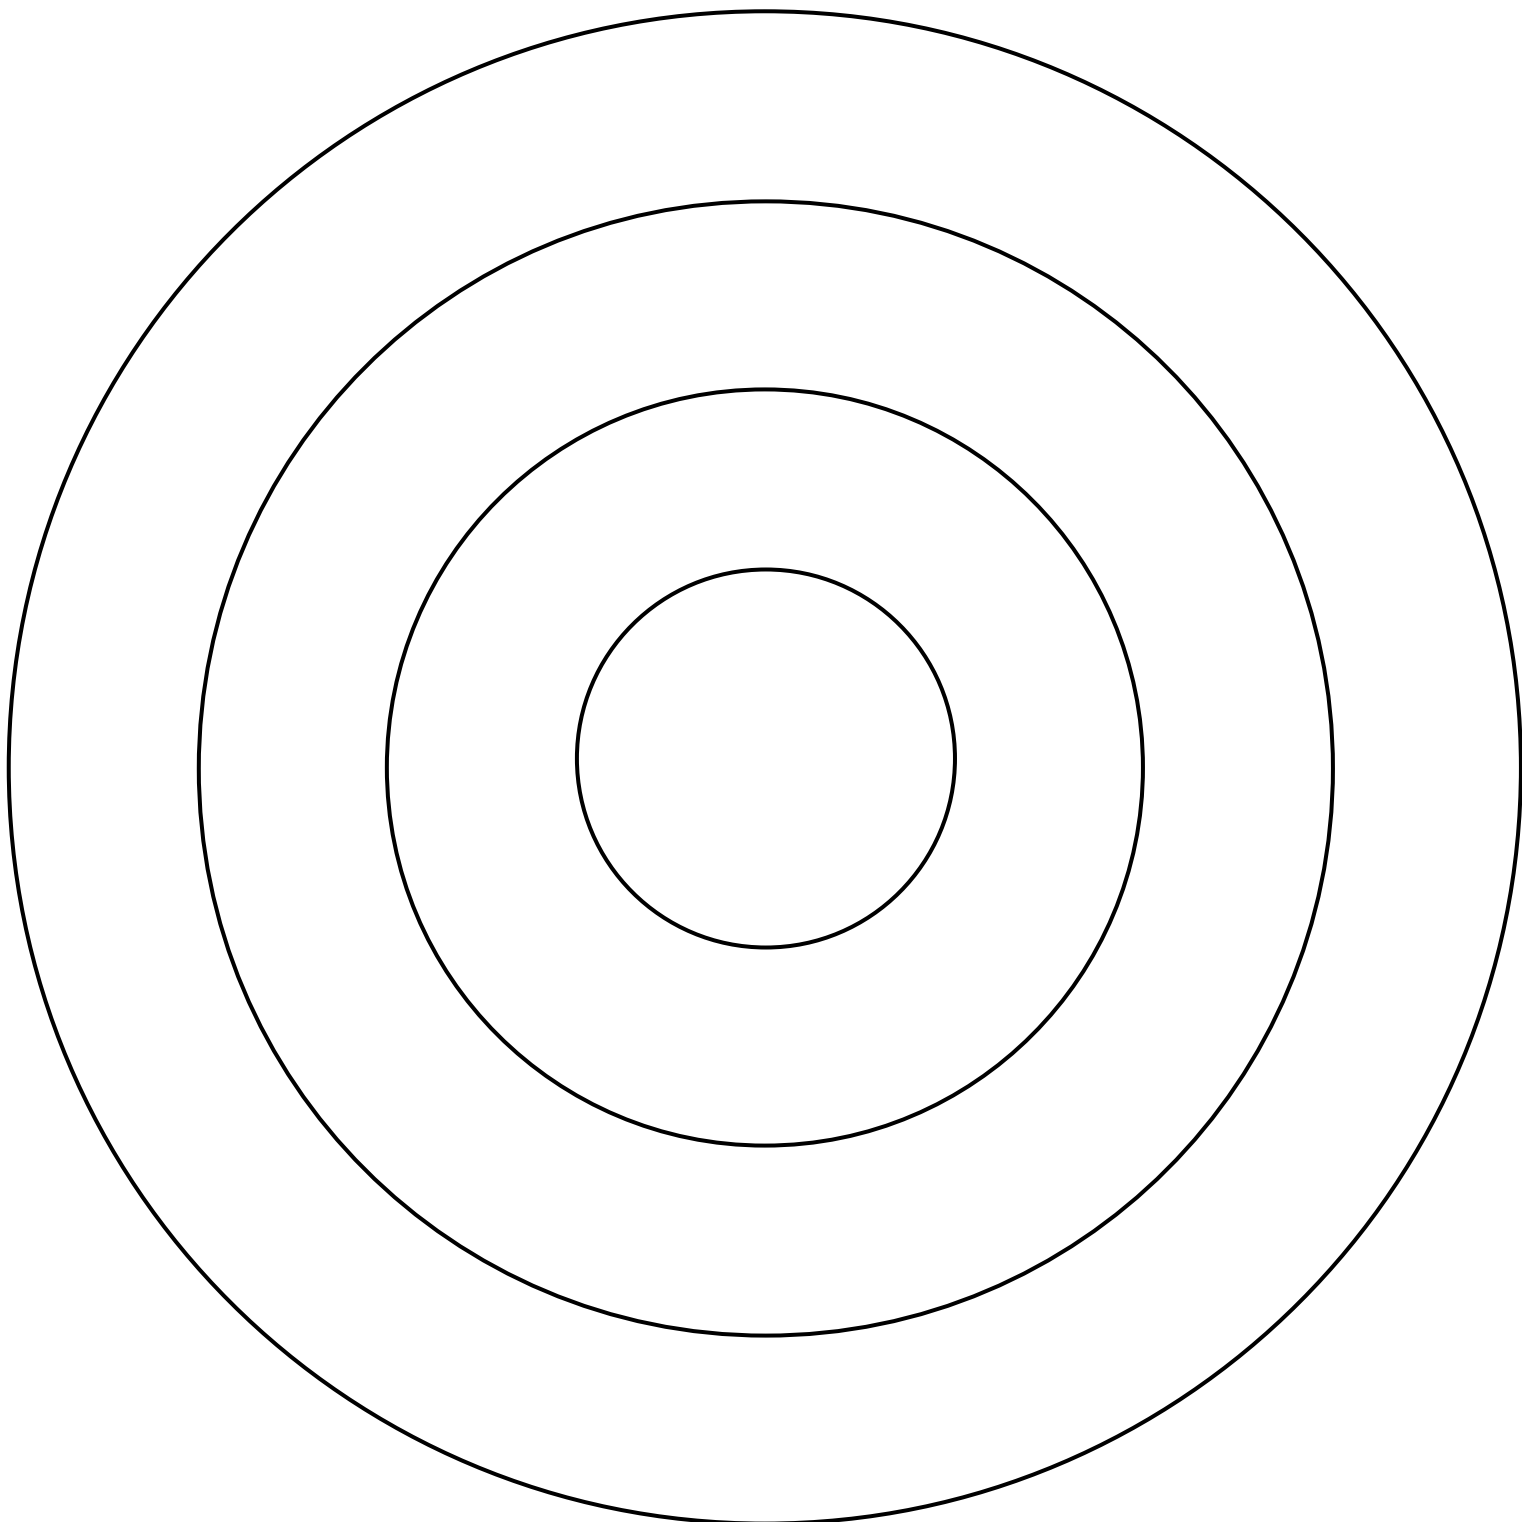

Supplement: MOESM2 [file 12884_2022_5170_MOESM2_ESM.pdf]
